# Supplementary material for: Microbial Genetics and Clonal Dissemination of Salmonella enterica Serotype Javiana Isolated from Human Populations in Arkansas, USA
Source: MDPI journal article supplement (doi:10.3390/pathogens11101192), 2022-10-16

**Supplemental Table S1 *Salmonella enterica* serovar Javiana virulence gene targets, their function, primer sequences and amplicon sizes used in this study**

| Target gene | Function                                               | Oligonucleotide sequence                                              | Amplicon size | Reference              |
|-------------|--------------------------------------------------------|-----------------------------------------------------------------------|---------------|------------------------|
| <i>spvB</i> | Growth within host                                     | F: CTATCAGCCCCGCACGGAGAGCAGTTTTTA<br>R: GGAGGAGGCGGTGGCGGTGGCATCATA   | 717           | Skyberg, Av. Dis, 2006 |
| <i>spiA</i> | Survival within macrophage                             | F: CCAGGGGTCTTAGTGTATTGCGTGAGATG<br>R: CGCGTAACAAAGAACCCGTAGTGATGGATT | 550           | Skyberg, Av. Dis, 2006 |
| <i>pagC</i> | Survival within macrophage                             | F: CGCCTTTTCCGTGGGGTATGC<br>R: GAAGCCGTTATTTTTGTAGAGGAGATGTT          | 454           | Skyberg, Av. Dis, 2006 |
| <i>cdtB</i> | Host recognition/invasion                              | F: ACAACTGTCGCATCTCGCCCCGTCATT<br>R: CAATTTGCGTGCGTTCTGTAGGTGCGAGT    | 268           | Skyberg, Av. Dis, 2006 |
| <i>msgA</i> | Survival within macrophage                             | F: GCCAGGCGCACGCGAAATCATCC<br>R: GCGACCAGCCACATATCAGCCTCTTCAAAC       | 189           | Skyberg, Av. Dis, 2006 |
| <i>sipB</i> | Entry into nonphagocytic cells, killing of macrophages | F: GGACGCCGCCCGGGAAAACTCTC<br>R: AACTCCCCTCGCCGCCTTCACAA              | 875           | Skyberg, Av. Dis, 2006 |
| <i>prgH</i> | Host recognition/invasion                              | F: GCCCGAGCAGCCTGAGAAGTTAGAAA<br>R: TGAAATGAGCGCCCTTGAGCCAGTC         | 756           | Skyberg, Av. Dis, 2006 |
| <i>spaN</i> | Entry into nonphagocytic cells, killing of macrophages | F: AAAAGCCGTGGAATCCGTTAGTGAAGT<br>R: CAGCGCTGGGGATTACCGTTTTG          | 504           | Skyberg, Av. Dis, 2006 |
| <i>orgA</i> | Host recognition/invasion                              | F: TTTTGGCAATGCATCAGGGAACA<br>R: GGCGAAAGCGGGGACGGTATT                | 255           | Skyberg, Av. Dis, 2006 |
| <i>tolC</i> | Host recognition/invasion                              | F: TACCCAGGCGCAAAAAGAGGCTATC<br>R: CCGCGTTATCCAGGTTGTTGC              | 161           | Skyberg, Av. Dis, 2006 |
| <i>lpfC</i> | Host recognition/invasion                              | F: GCCCCGCTGAAGCCTGTGTTGC<br>R: AGGTCGCCGCTGTTTGAGGTTGGATA            | 641           | Skyberg, Av. Dis, 2006 |
| <i>sifA</i> | Filamentous structure formation                        | F: TTGCCGAACGCGCCCCACACG<br>R: GTTGCTTTTCTTGCGCTTCCACCCATCT           | 449           | Skyberg, Av. Dis, 2006 |
| <i>sopB</i> | Host recognition/invasion                              | F: ATGCAAATACAGAGCTTCTATCA<br>R: GGCATAAAGGGACAGCACA                  | 1700          | Nayak, IJFM, 2004      |
| <i>pefB</i> | Host recognition/invasion                              | F: TGATGCTGAACAGAAAAGAT<br>R: ATAATAACAACCATGTGAG                     | 296           | Foley, JCM, 2006       |
| <i>iroN</i> | Iron acquisition                                       | F: ACTGGCACGGCTCGCTGTCGCTCTAT<br>R: CGCTTTACCGCGTTCTGCCACTGC          | 1205          | Skyberg, Av. Dis, 2006 |
| <i>sitA</i> | Iron acquisition                                       | F: AAGCGTTGGAACCACAATTC<br>R: GTCCTCACCTGCTCGATAGC                    | 245           |                        |

|              |                                                                 |                                                           |     |                                 |
|--------------|-----------------------------------------------------------------|-----------------------------------------------------------|-----|---------------------------------|
| <i>hilA</i>  | Host recognition/invasion                                       | F:TTAATCGTCCGGTCGTAGTG<br>R:TCTGCCAGCGCACAGTAAGG          | 597 | Foley, JCM, 2006                |
| <i>fimH</i>  | Adhesion to cells                                               | F:GGGACGGCGACCGATATCTT<br>R:TTGTCTGGCGAGGGATCGTC          | 412 | Foley, JCM, 2006                |
| <i>iss</i>   | Survival                                                        | F:TCACATAGGATTCTGCCG<br>R:AGAAATCAAAAGGTGGCC              | 607 | Dezfulian, JCM, 2003            |
| <i>iutA</i>  | Aerobaction receptor                                            | F:GGCTGGACATCATGGGAAGTGG<br>R:CGTCGGGAACGGGTAGAATCG       | 302 |                                 |
| <i>iucC</i>  | Iron uptake; intracellular growth                               | F:GTCGCCGTGGTGGGGTAAGAG<br>R:TCCCCCGGTAGCATGAGGTGTTGT     | 429 |                                 |
| <i>virB4</i> | Type 4 secretion system                                         | F:TTGGCATTGATGGCACCGAGTTTC<br>R:TGTAATCGGCATCAGGGTTAGCCA  | 315 |                                 |
| <i>virD4</i> | Type 4 secretion system                                         | F:TCGGCCTCTCAGCTTGAGGAAATCT<br>R:TTTGCAAGTTCGGGAGCAACCTTC | 370 |                                 |
| <i>invA</i>  | Host recognition/invasion                                       | F:TATCGCCACGTTCCGGGCAA<br>R:TCGCACCGTCAAAGGAACC           | 275 | Nayak, IJFM, 2004               |
| <i>h-li</i>  | Flagellin                                                       | F:AGCCTCGGCTACTGGTCTTG<br>R:CCGCAGCAAGAGTCACCTCA          | 173 | Nayak, IJFM, 2004               |
| <i>aceK</i>  | Regulation of isocitrate in tricarboxylic and glyoxylate bypass | F:CAGGGCGAGGGTATGAAACAC<br>R:AACTGCGATTCTTCGGTAGAAC       | 191 | Nayak, IJFM, 2004               |
| <i>iapP</i>  | Invasion associated acyl carrier                                | F:CACCTCTTGTATTGCCGTTG<br>R:GGCATATATCCGCAAAGGTC          | 176 | Zou, unpub. data                |
| <i>sopE</i>  | Encodes a effector protein                                      | F:ATTGTTGTGGCGTTGGCATCGT<br>R:AATGCGAGTAAAGATCCGGCCT      | 186 | Zou, unpub. Data                |
| <i>rhuM</i>  | Encodes a cytoplasmic protein                                   | F:CATCGGCTGTACCCGACTAT<br>R:CAGCACGCTGATGAATGAGT          | 222 | Zou, unpub. Data                |
| <i>spi4H</i> | Inhibits serine peptidase                                       | F:ACTGCTCGCTTGTGGTATCAGGAA<br>R:TCTTACCGTGCTGTGGATGGTTCA  | 154 | Courtney, Mol Cell Probes, 2006 |
| <i>ttrB</i>  | Tetrathionate respiration                                       | F:ATGTGGACGGGAGTCAATATGG<br>R:GTGGCGATGCGGCTATGG          | 608 | Courtney, Mol Cell Probes, 2006 |
| <i>sugR</i>  | Encodes ATP binding protein                                     | F:ACTGCTCGCTTGTGGTATCAGGAA<br>R:TCTTACCGTGCTGTGGATGGTTCA  | 152 | Zou, unpub. Data                |

|             |                                       |                                                        |     |                                 |
|-------------|---------------------------------------|--------------------------------------------------------|-----|---------------------------------|
| <i>purR</i> | DNA-binding transcriptional repressor | F: CGCTTCCCCTTTTCCTCAAG<br>R: CCATCACCACCATCGGAATATG   | 629 | Courtney, Mol Cell Probes, 2006 |
| <i>rmbA</i> | Encodes a cytoplasmic protein         | F: AGCCTTCACAAATTGTCCATTG<br>R: TCCGTATAGTTAAGCGTTCGTC | 454 | Courtney, Mol Cell Probes, 2006 |
| <i>avrA</i> | Encodes a secreted effector protein   | F:AATGGAAGGCGTTGAATCTG<br>R: GAGCTGCTTTGGTCCTCAAC      | 170 | Zou, unpub. Data                |

---

Supplemental Figure S1 Dendrogram based on *Xba*I and *Avr*II pulsed-field gel electrophoresis macro-restriction profiles of *Salmonella* Javiana strains. The dendrogram on the left illustrates *Xba*I digested profiles, while the dendrograms on the right illustrate *Avr*II digested profiles for the corresponding cluster

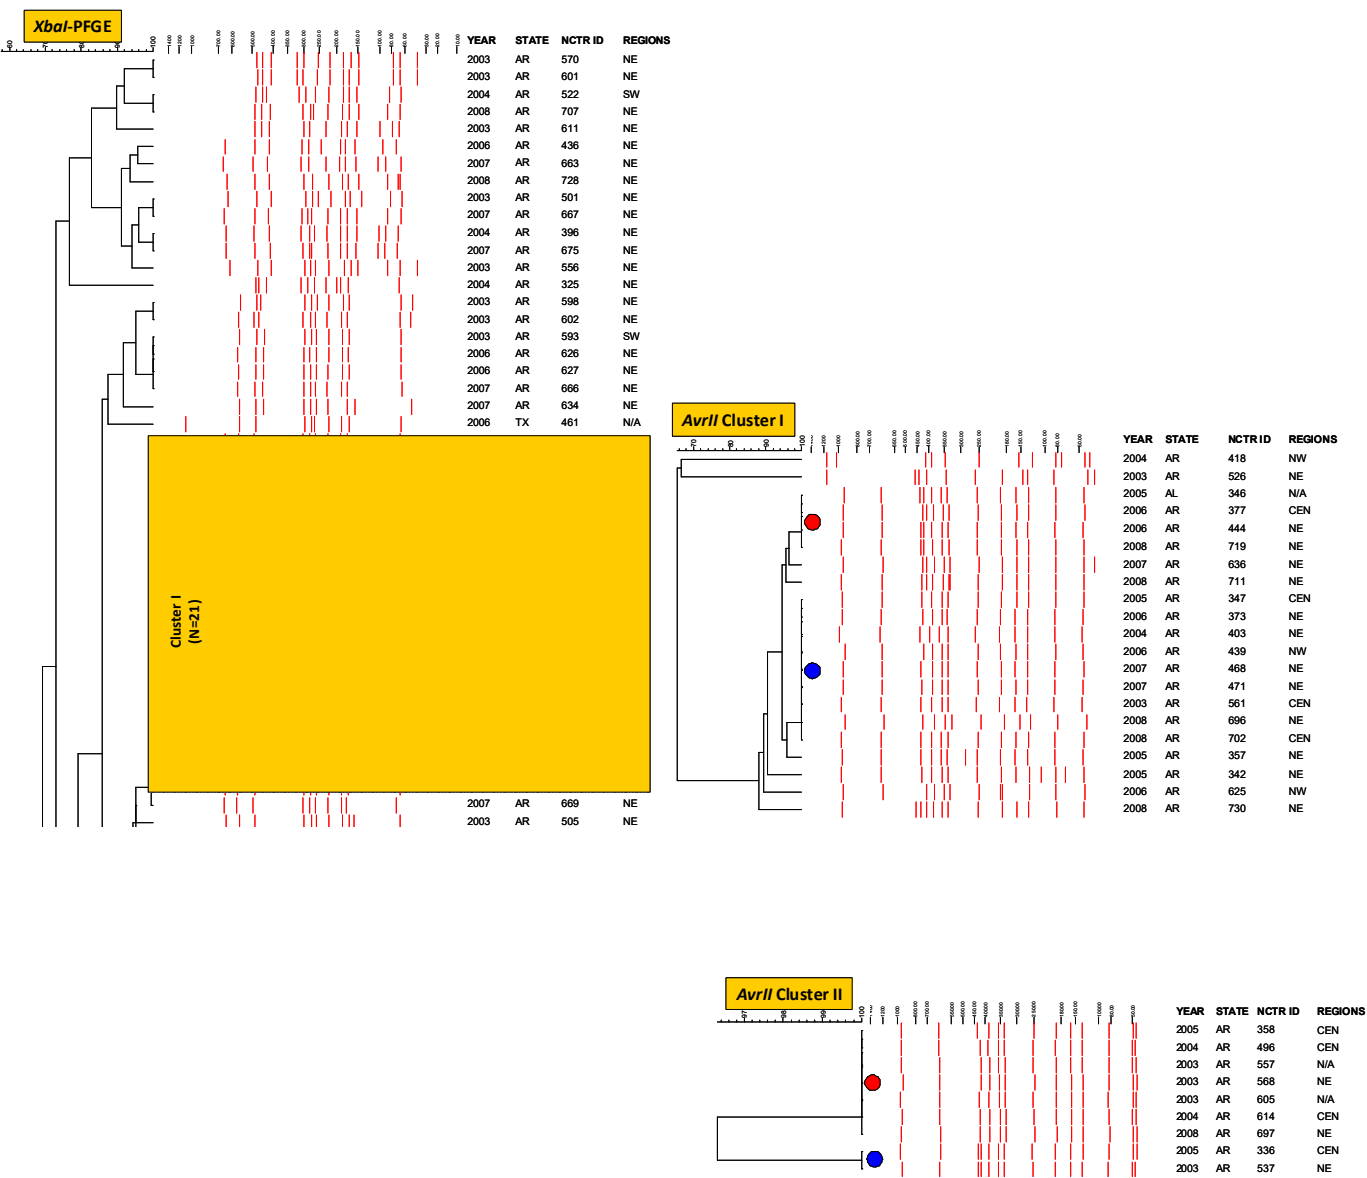

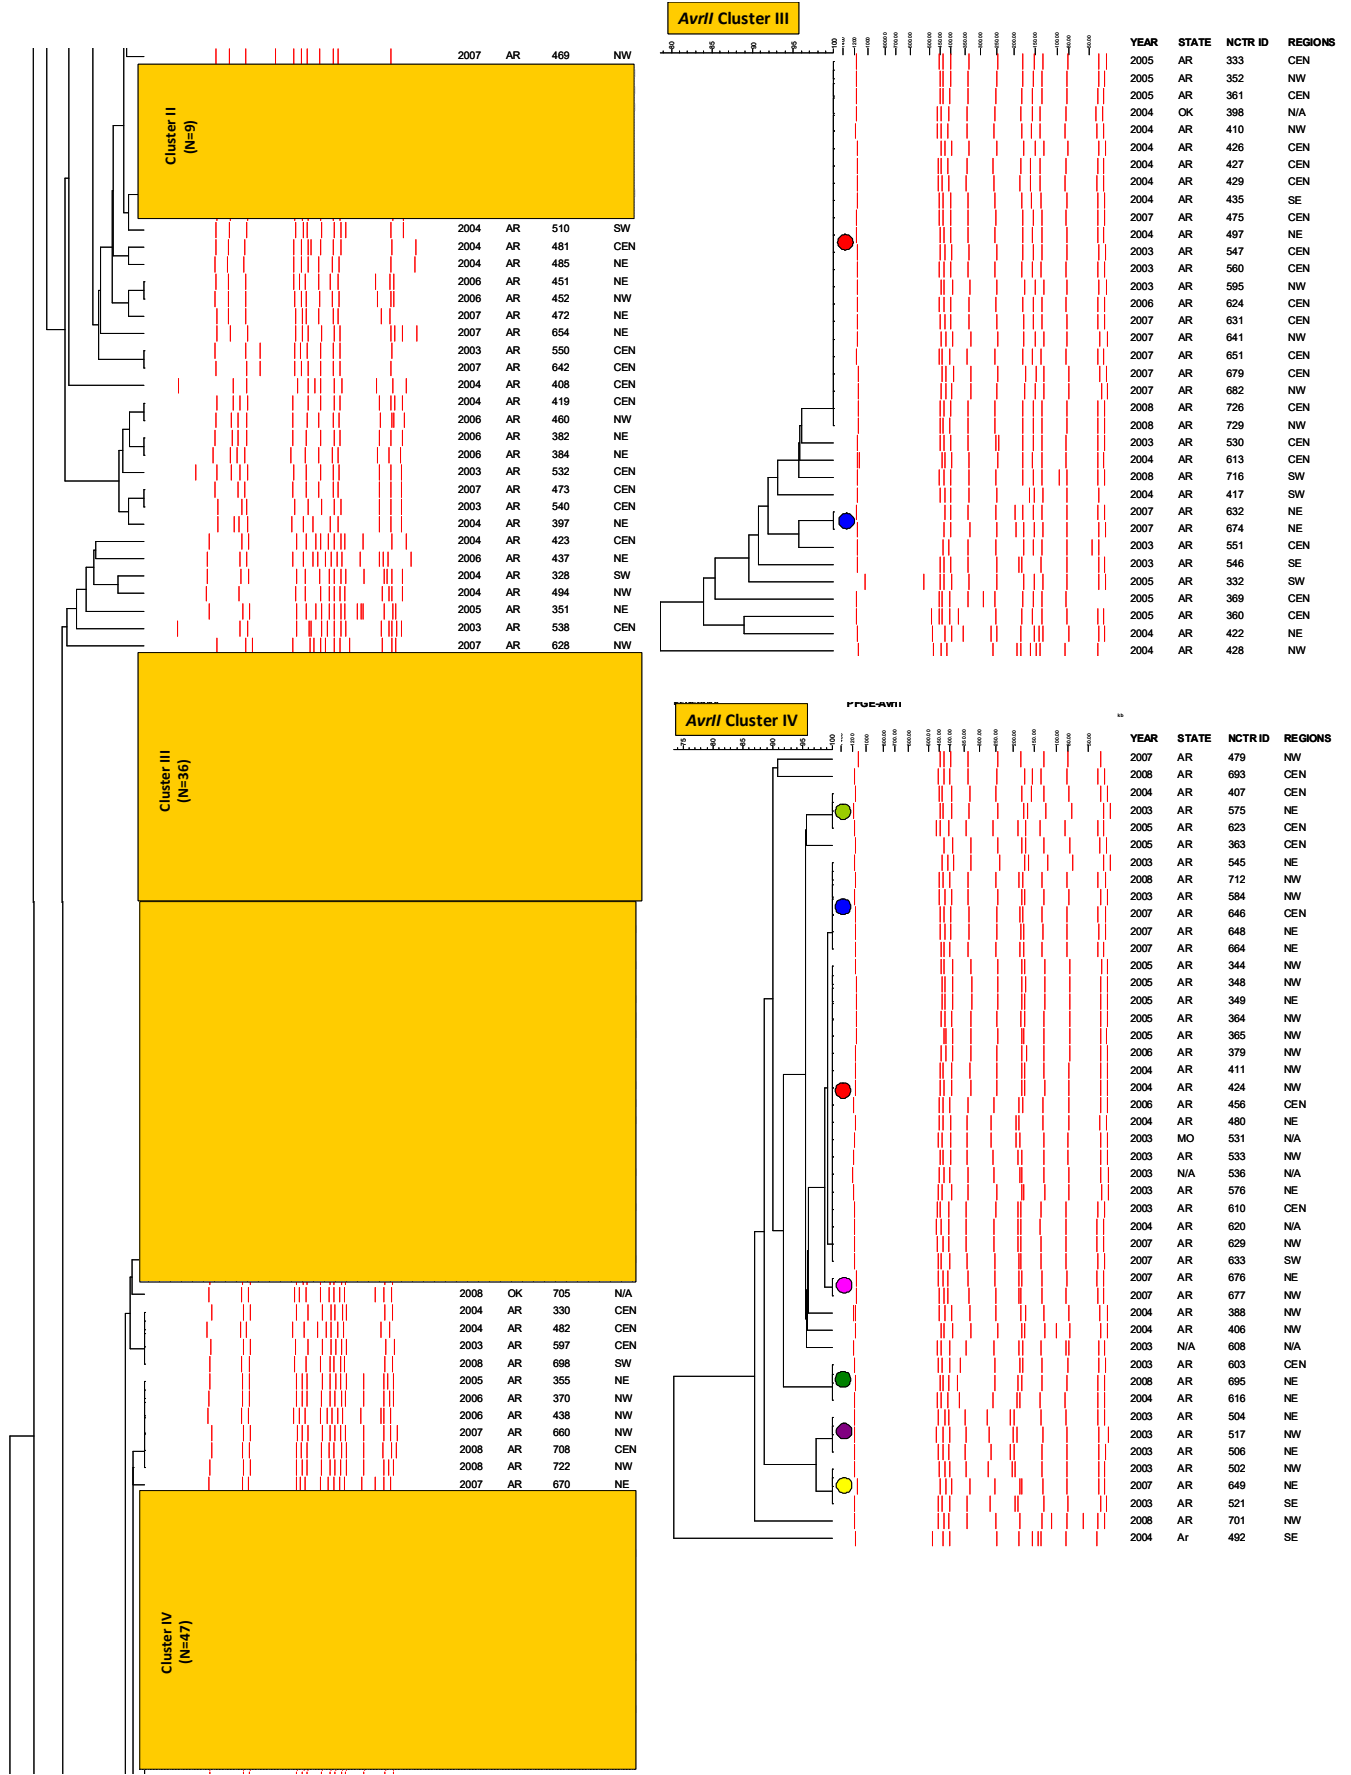

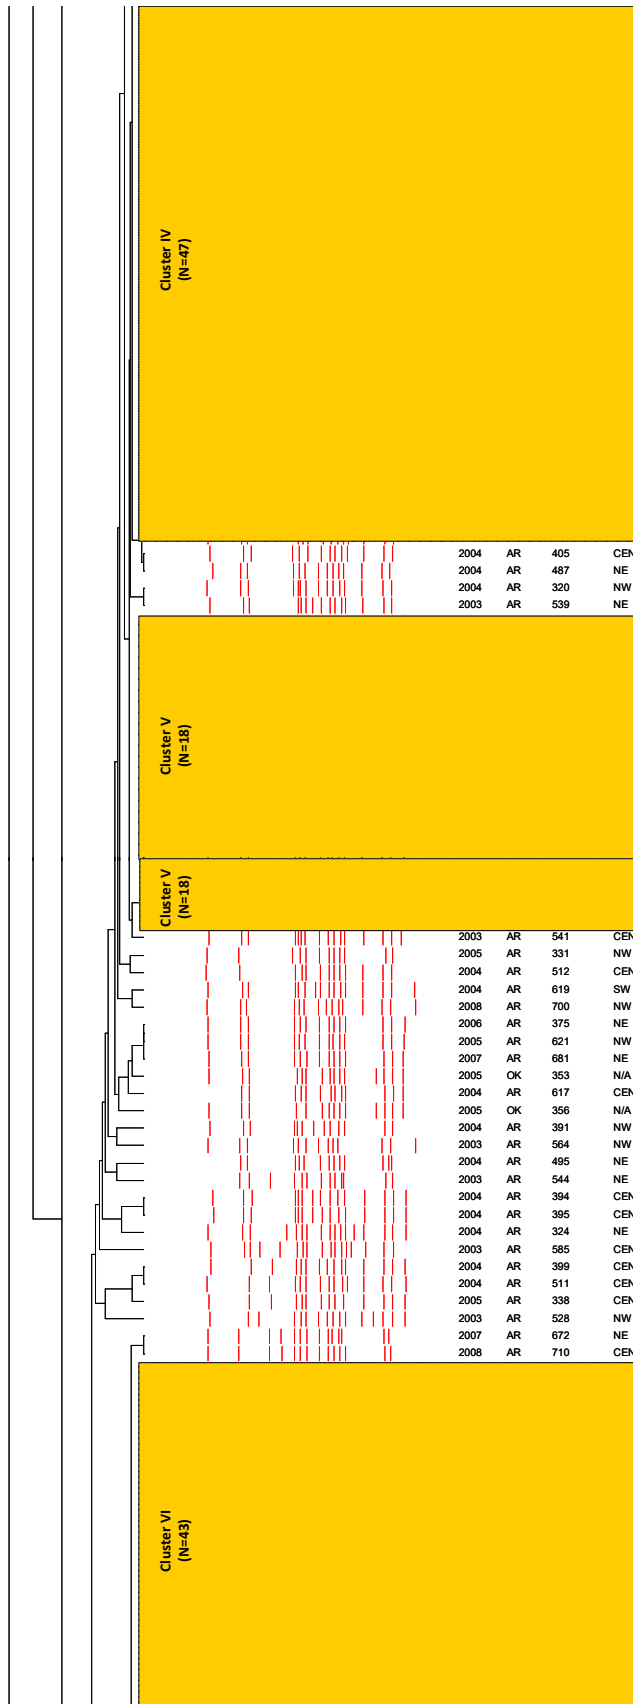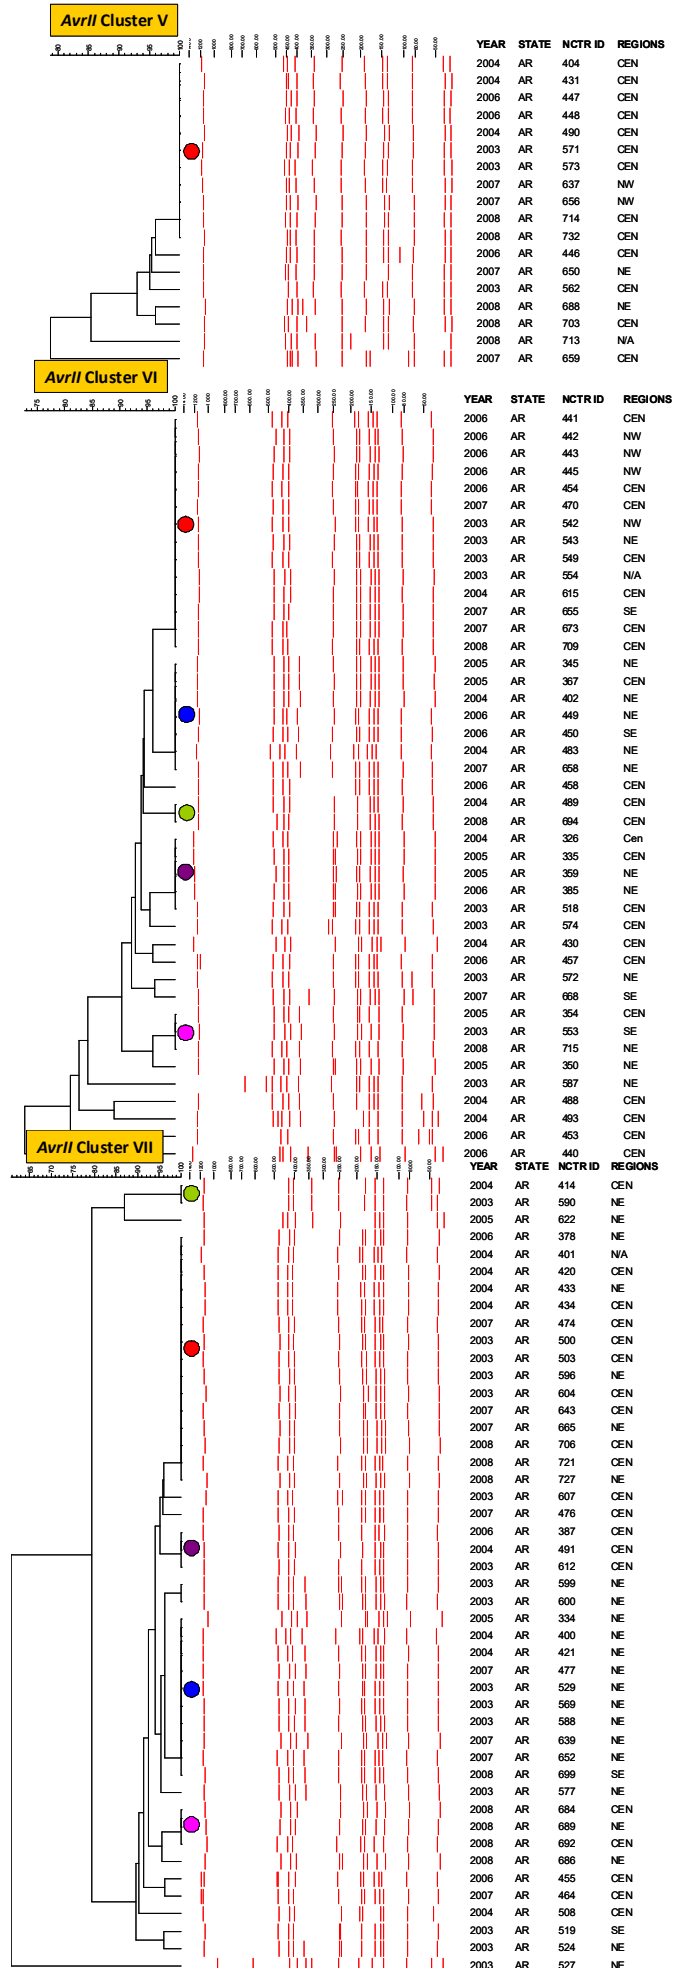

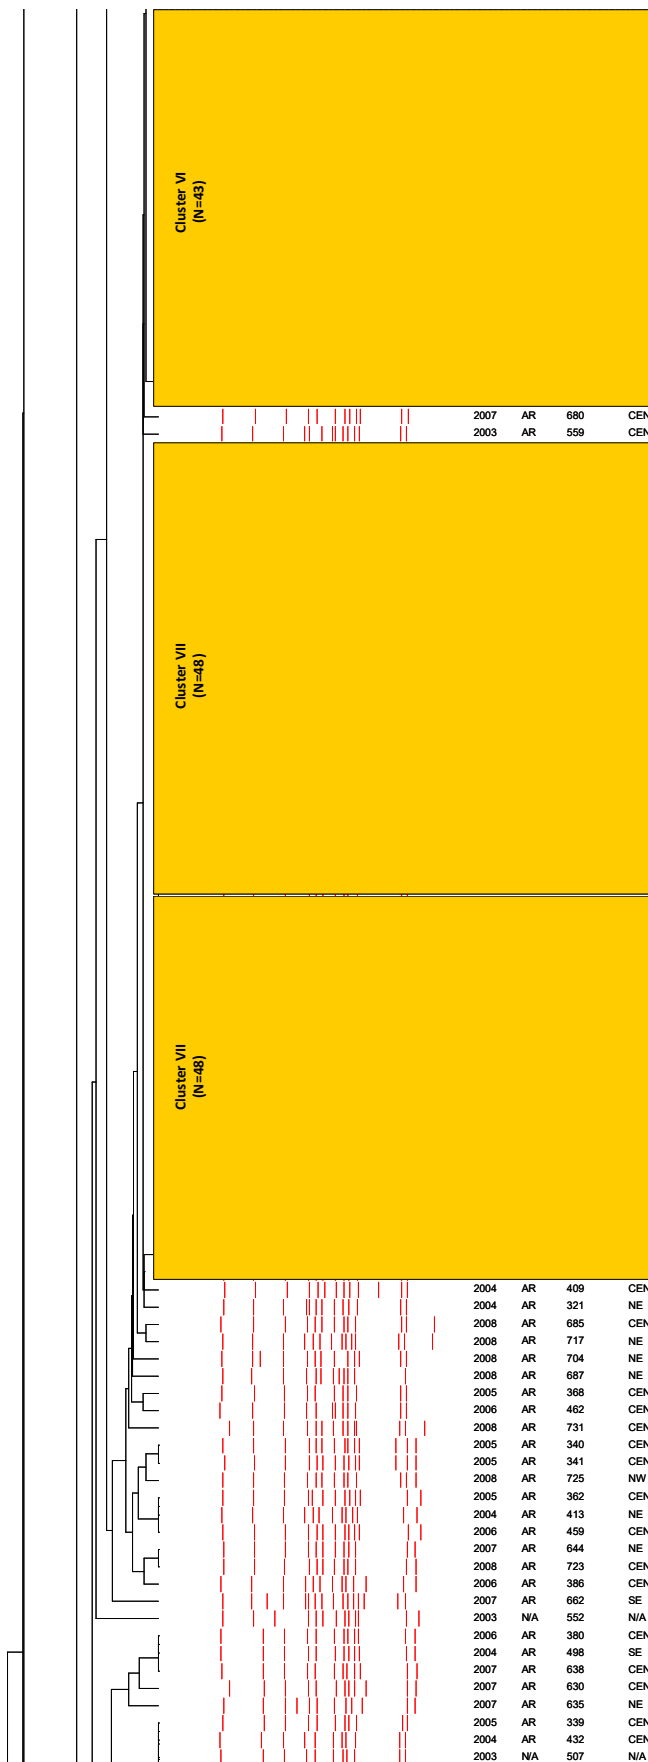

AvrII Cluster VIII

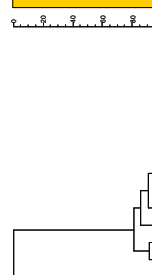

AvrII Cluster IX

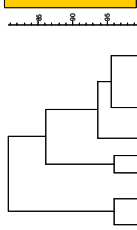

| YEAR | STATE | NCTR ID | REGIONS |
|------|-------|---------|---------|
| 2004 | AR    | 323     | CEN     |
| 2004 | AR    | 327     | CEN     |
| 2005 | AR    | 343     | CEN     |
| 2005 | AR    | 366     | CEN     |
| 2006 | AR    | 376     | CEN     |
| 2004 | AR    | 416     | CEN     |
| 2004 | AR    | 425     | CEN     |
| 2003 | AR    | 548     | SW      |
| 2005 | AR    | 337     | CEN     |
| 2008 | AR    | 718     | CEN     |
| 2003 | AR    | 516     | CEN     |
| 2007 | AR    | 647     | NE      |
| 2004 | AR    | 322     | SE      |
| 2004 | AR    | 389     | CEN     |
| 2003 | AR    | 589     | CEN     |

| YEAR | STATE | NCTR ID | REGIONS |
|------|-------|---------|---------|
| 2007 | AR    | 478     | CEN     |
| 2003 | AR    | 565     | NW      |
| 2007 | AR    | 671     | CEN     |
| 2007 | AR    | 465     | CEN     |
| 2004 | AR    | 484     | SE      |
| 2007 | AR    | 678     | CEN     |
| 2004 | AR    | 618     | NE      |
| 2006 | AR    | 374     | CEN     |
| 2003 | AR    | 583     | NW      |
| 2003 | AR    | 566     | N/A     |
| 2008 | AR    | 683     | CEN     |
| 2007 | AR    | 653     | NE      |

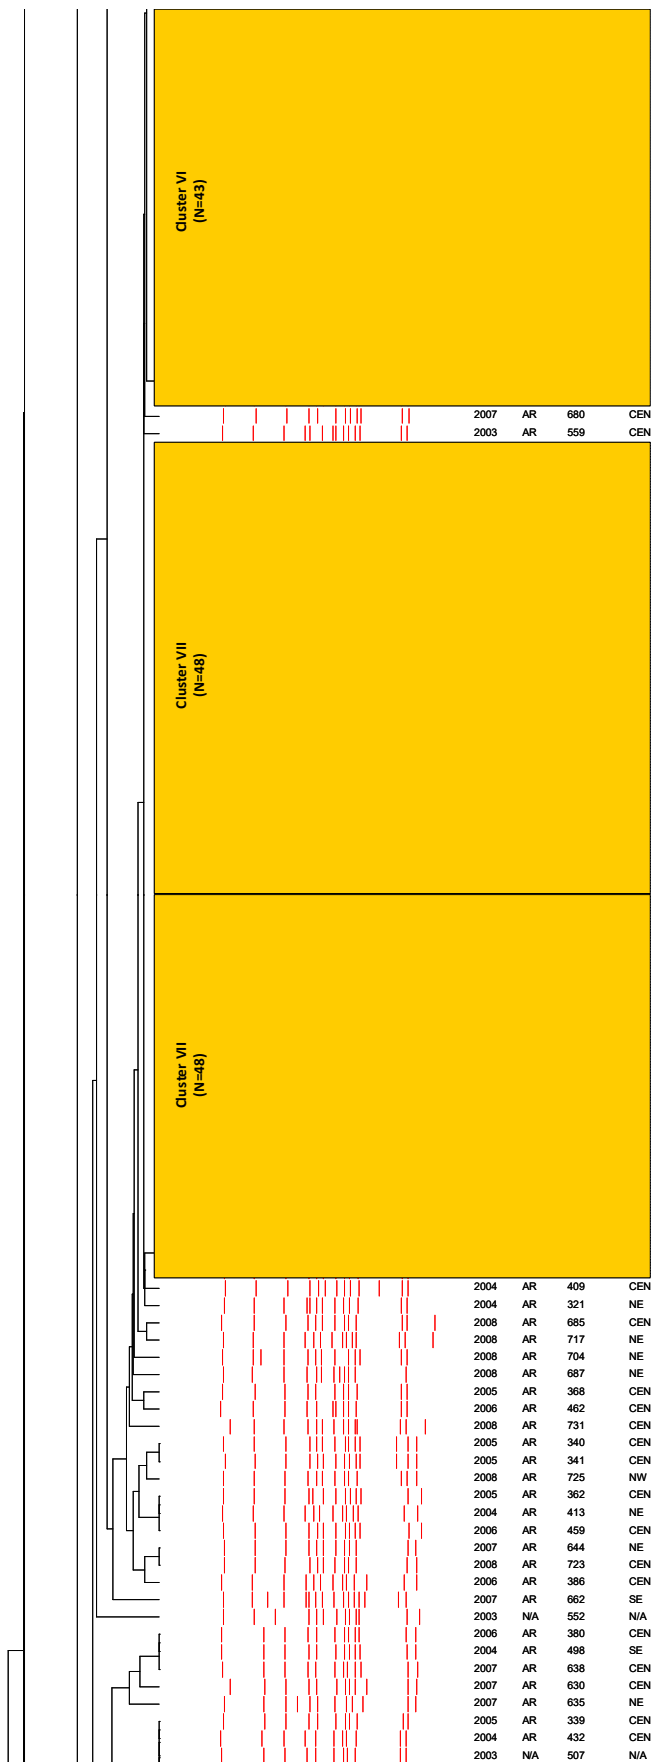

**AvrII Cluster VIII**

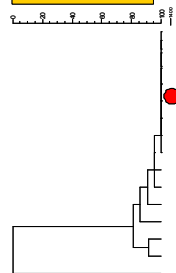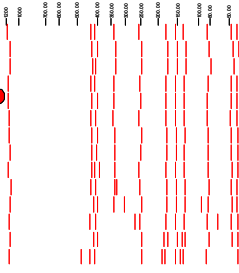

| YEAR | STATE | NCTR ID | REGIONS |
|------|-------|---------|---------|
| 2004 | AR    | 323     | CEN     |
| 2004 | AR    | 327     | CEN     |
| 2005 | AR    | 343     | CEN     |
| 2005 | AR    | 366     | CEN     |
| 2006 | AR    | 376     | CEN     |
| 2004 | AR    | 416     | CEN     |
| 2004 | AR    | 425     | CEN     |
| 2003 | AR    | 548     | SW      |
| 2005 | AR    | 337     | CEN     |
| 2008 | AR    | 718     | CEN     |
| 2003 | AR    | 516     | CEN     |
| 2007 | AR    | 647     | NE      |
| 2004 | AR    | 322     | SE      |
| 2004 | AR    | 389     | CEN     |
| 2003 | AR    | 589     | CEN     |

**AvrII Cluster IX**

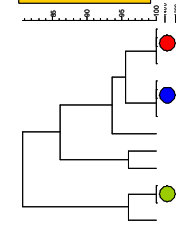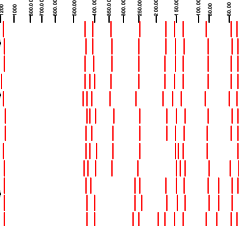

| YEAR | STATE | NCTR ID | REGIONS |
|------|-------|---------|---------|
| 2007 | AR    | 478     | CEN     |
| 2003 | AR    | 565     | NW      |
| 2007 | AR    | 671     | CEN     |
| 2007 | AR    | 465     | CEN     |
| 2004 | AR    | 484     | SE      |
| 2007 | AR    | 678     | CEN     |
| 2004 | AR    | 618     | NE      |
| 2006 | AR    | 374     | CEN     |
| 2003 | AR    | 583     | NW      |
| 2003 | AR    | 566     | N/A     |
| 2008 | AR    | 683     | CEN     |
| 2007 | AR    | 653     | NE      |



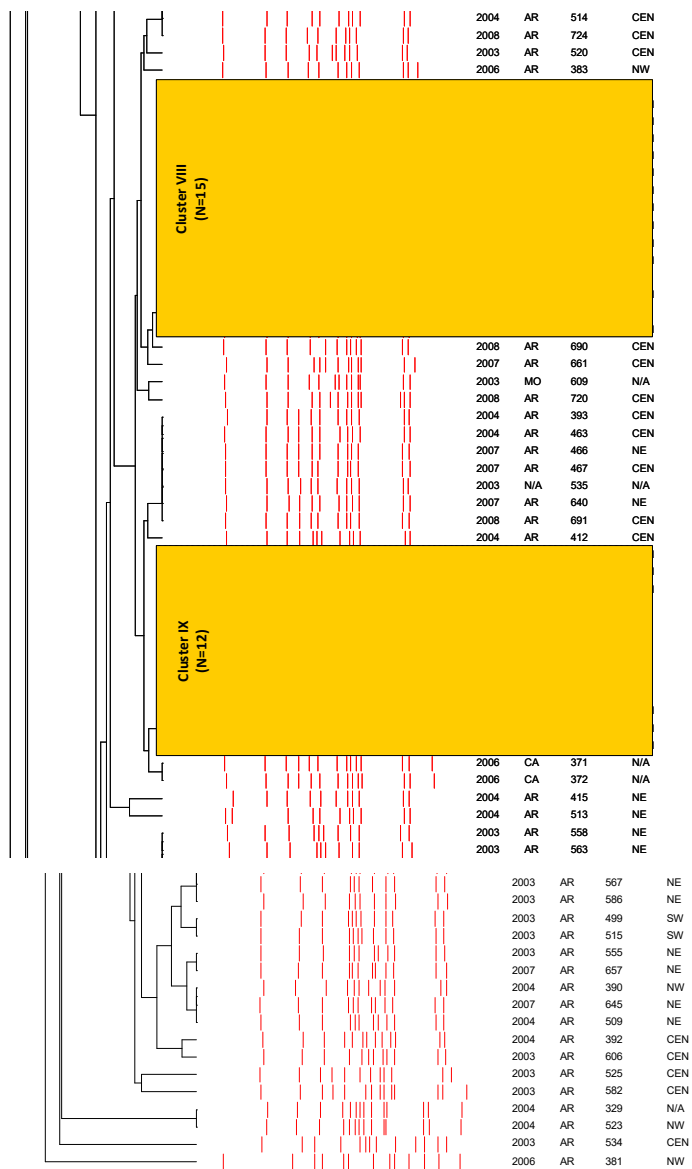

Supplement: s1 [file s1]
